# Supplementary figures and images for: Identification of Id1 as a downstream effector for arsenic-promoted angiogenesis via PI3K/Akt, NF-κB and NOS signaling
Source: Royal Society of Chemistry journal article supplement (doi:10.1039/c5tx00280j), 2015-10-05

# Suppl. Fig. 1

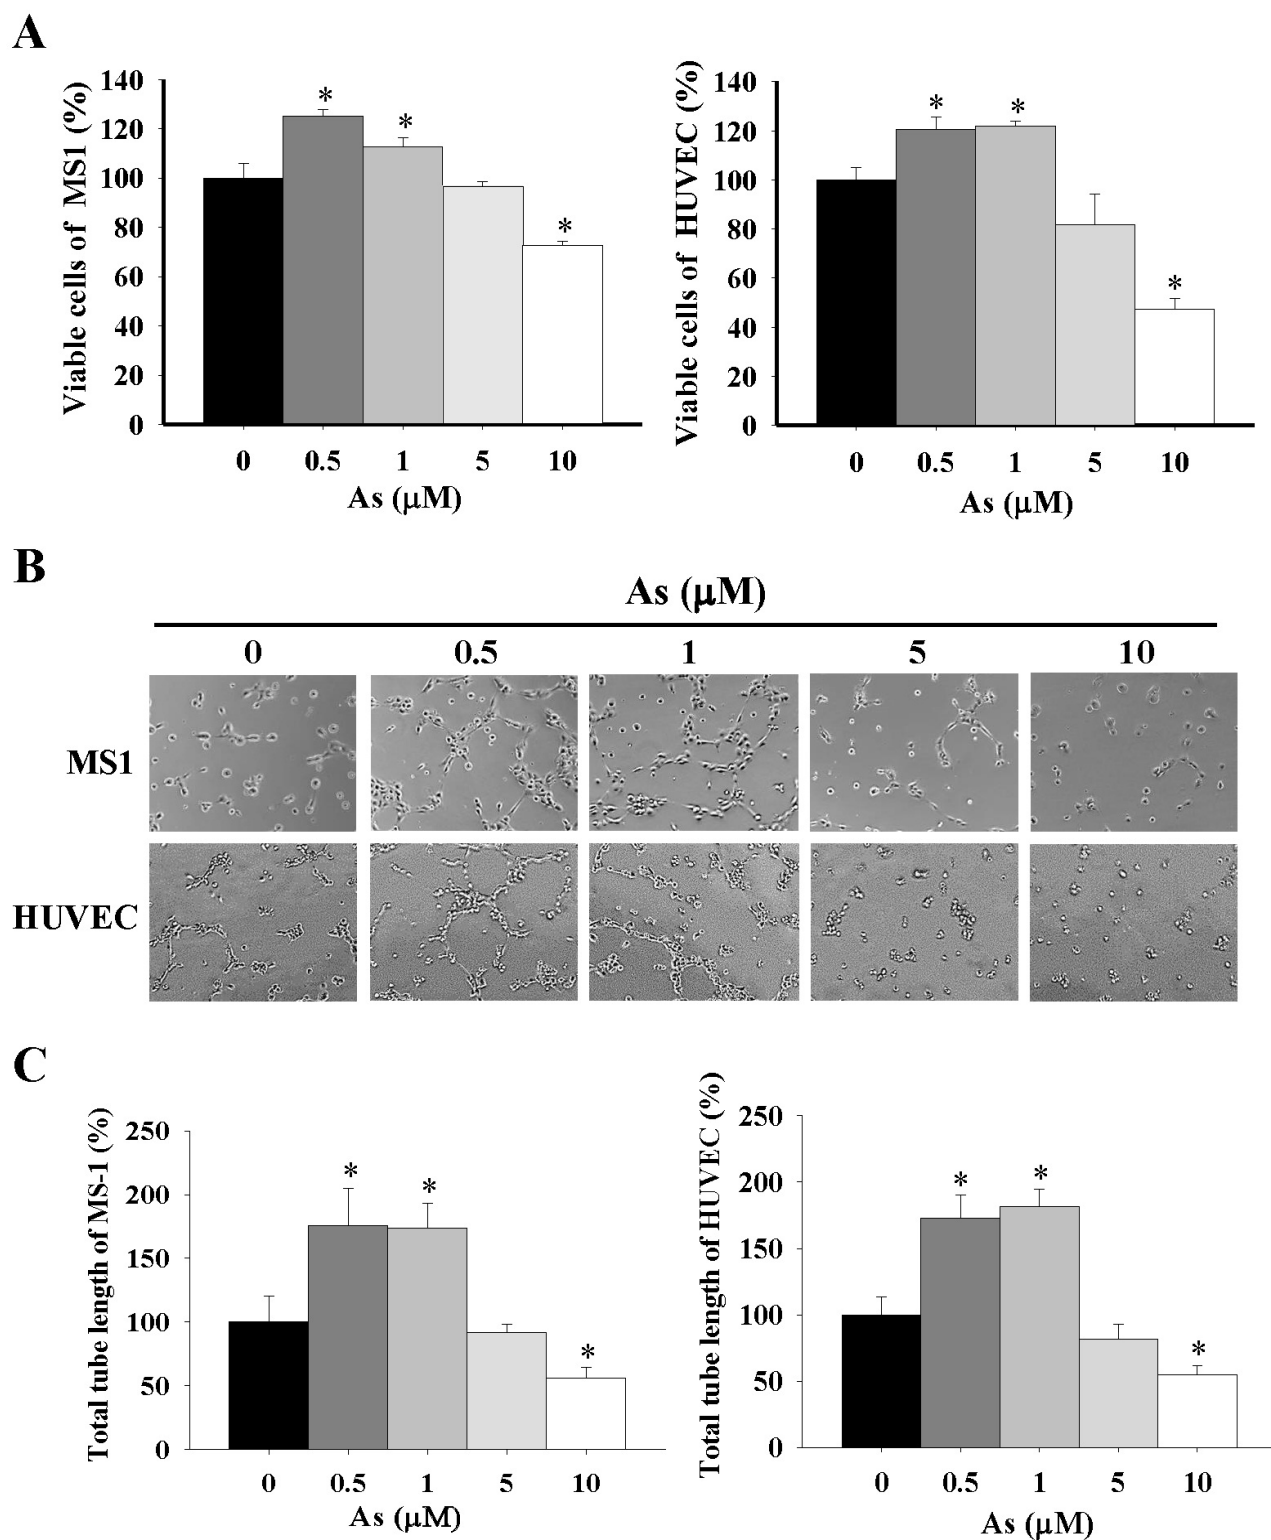

Supplement: c5tx00280j1.pdf [file c5tx00280j1.pdf]

## Suppl. Fig. 2

**A**

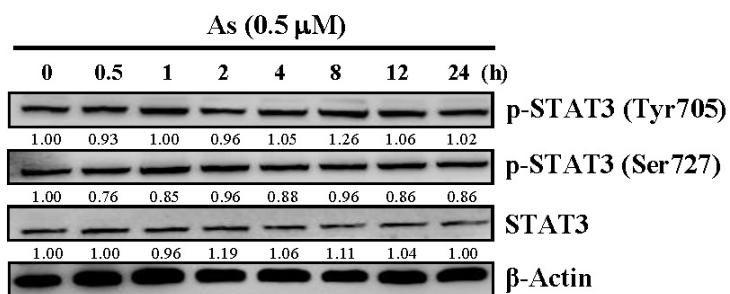

**B**

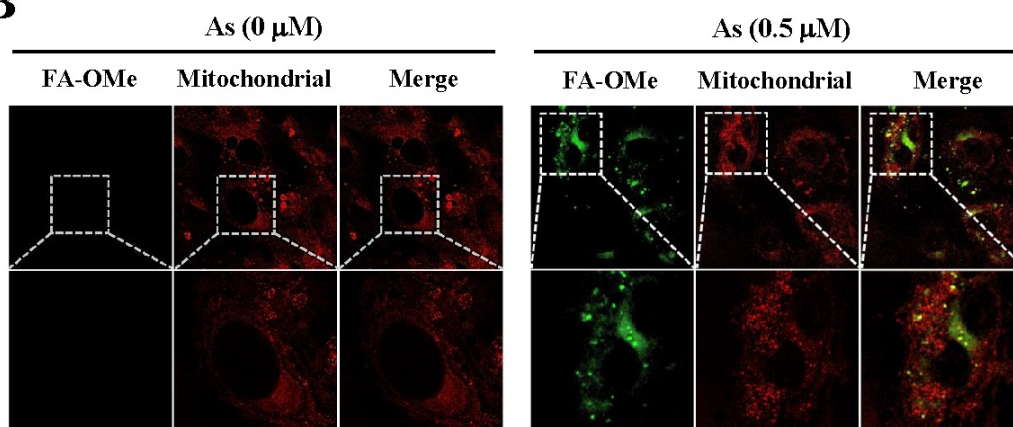

Supplement: c5tx00280j2.pdf [file c5tx00280j2.pdf]
